# Supplementary material for: Synthesis and Biological Evaluation of Honokiol Derivatives Bearing 3-((5-phenyl-1,3,4-oxadiazol-2-yl)methyl)oxazol-2(3H)-ones as Potential Viral Entry Inhibitors against SARS-CoV-2
Source: Pharmaceuticals (Basel). 2021 Aug 31;14(9):885. doi: 10.3390/ph14090885 (PMC8471451; doi:10.3390/ph14090885)
Supplement: Supplementary file 1 [file pharmaceuticals-14-00885-s001.zip › pharmaceuticals-1355967-supplementary.pdf]

## Supplementary data

### Synthesis and biological evaluation of honokiol derivatives bearing 3-((5-phenyl-1,3,4-oxadiazol-2-yl)methyl)oxazol-2(3*H*)-ones as potential viral entry inhibitors against SARS-CoV-2

Yong Guo <sup>1,2,#</sup>, Jieru Meng <sup>1,#</sup>, Jiazheng, Liu<sup>1</sup>, Ting Xu<sup>1</sup>, Zhiyuang Zheng<sup>1</sup>,  
Zhi-Hong Jiang<sup>1</sup> and Li-Ping Bai <sup>1,\*</sup>

- <sup>1</sup> State key laboratory of Quality Research in Chinese Medicine, Macau Institute for Applied Research in Medicine and Health, Guangdong-Hong Kong-Macao Joint Laboratory of Respiratory Infectious Disease, Macau University of Science and Technology, Taipa, Macau, 999078, China; yguo@must.edu.mo; 1909853gct20002@student.must.edu.mo; 2009853DCT20001@student.must.edu.mo; 1909853ect30003@student.must.edu.mo; 1709853ect30001@student.must.edu.mo; zhjiang@must.edu.mo; lpbai@must.edu.mo
- <sup>2</sup> School of Pharmaceutical Sciences, Zhengzhou University, Zhengzhou, 450001, Henan Province, China; yguo@must.edu.mo

\* Correspondence: lpbai@must.edu.mo; Tel.: +853-8897-2403

# These authors contributed equally.

**HRMS,  $^1\text{H}$  NMR and  $^{13}\text{C}$  NMR spectra for compounds 6a-p:**

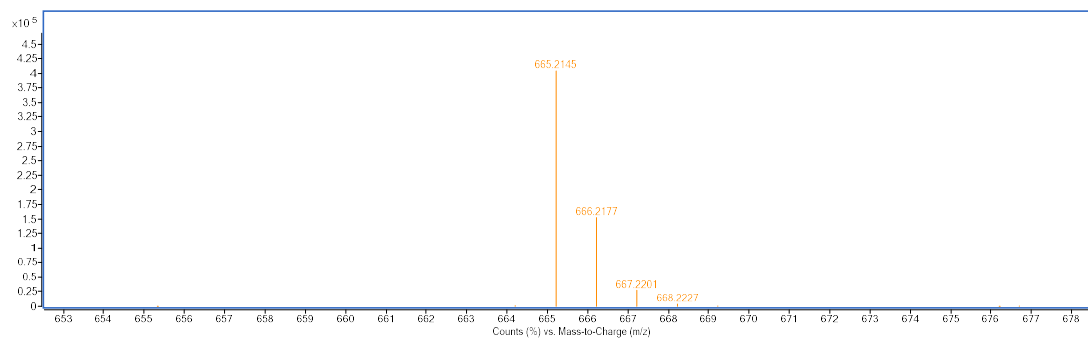

**Figure S1. HRMS spectrum of 6a**

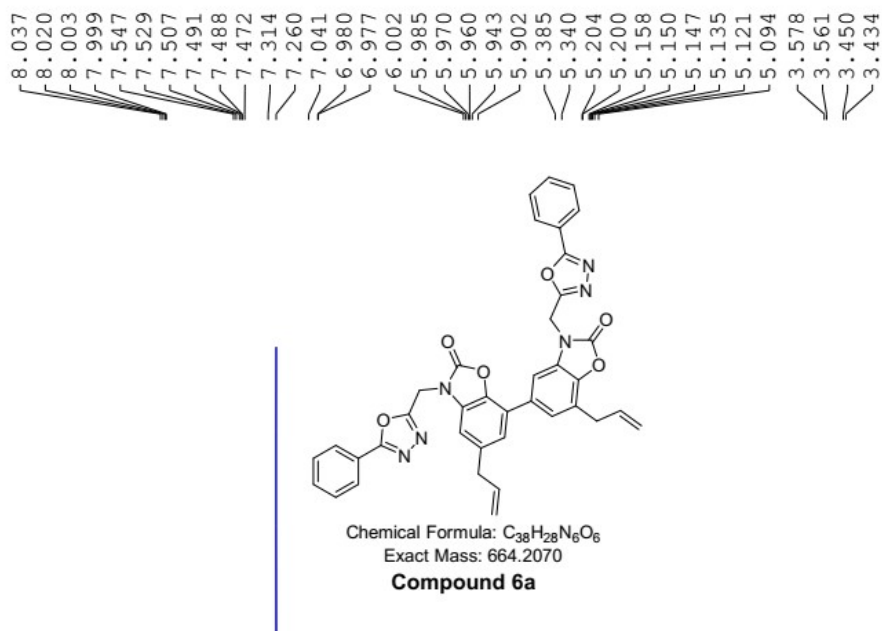

**Figure S2.  $^1\text{H}$  NMR spectrum of 6a**

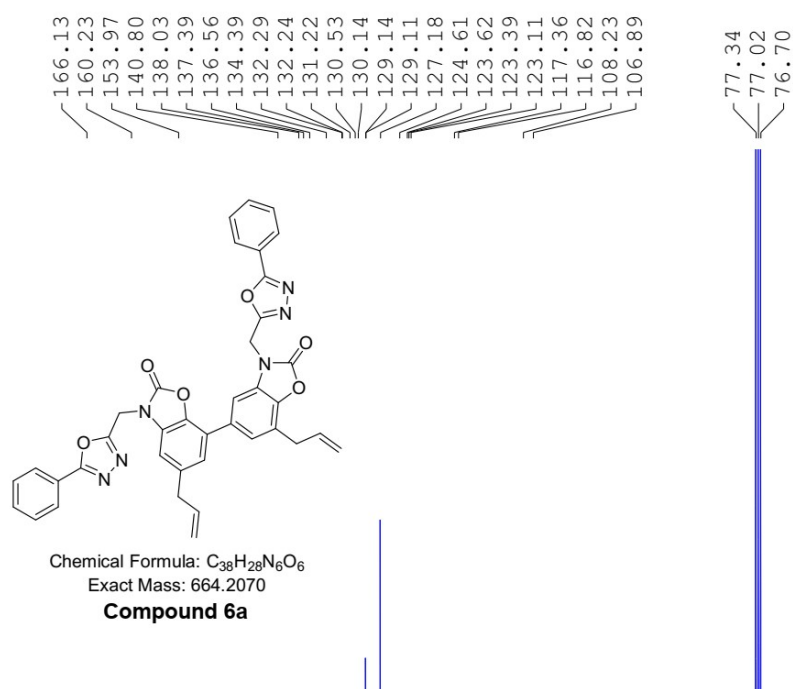

**Figure S3.**  $^{13}C$  NMR spectrum of **6a**

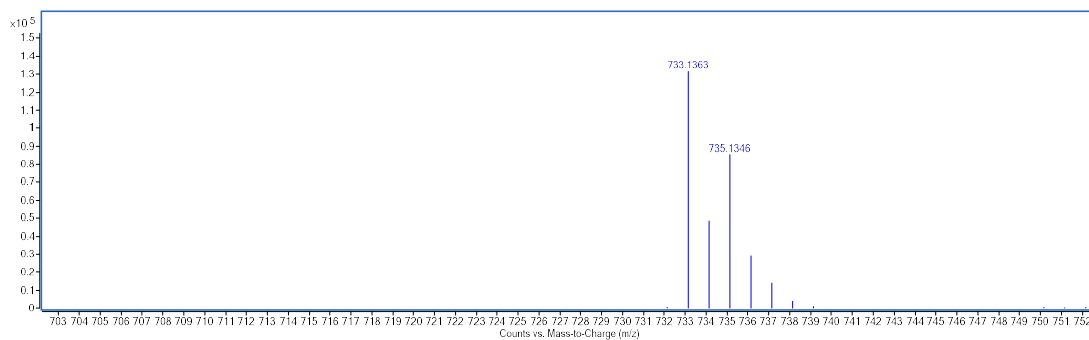

**Figure S4.** HRMS spectrum of **6b**

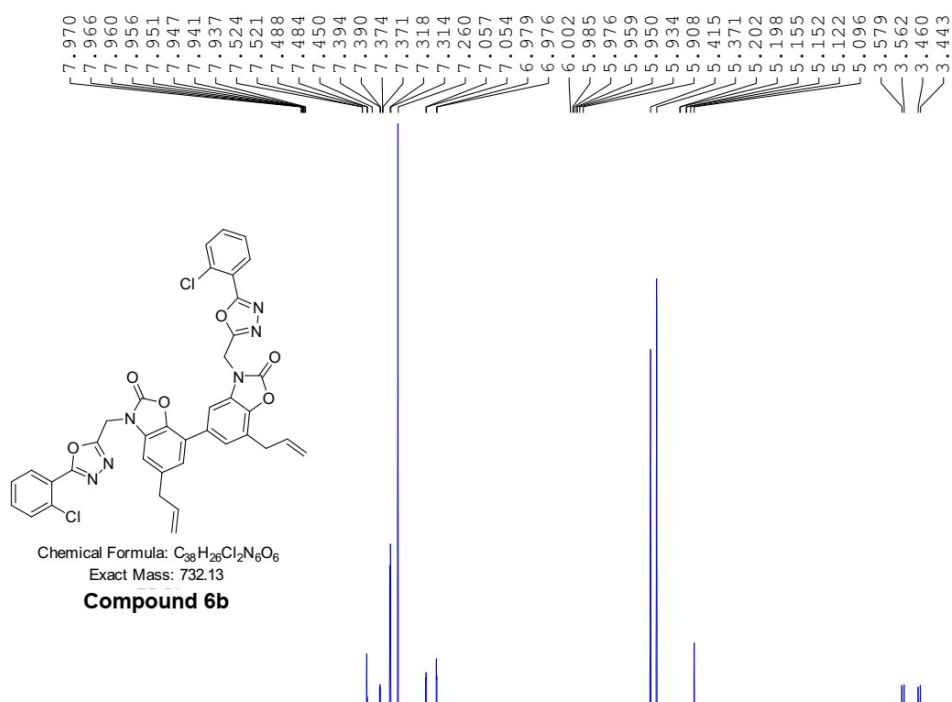

**Figure S5.**  $^1H$  NMR spectrum of **6b**

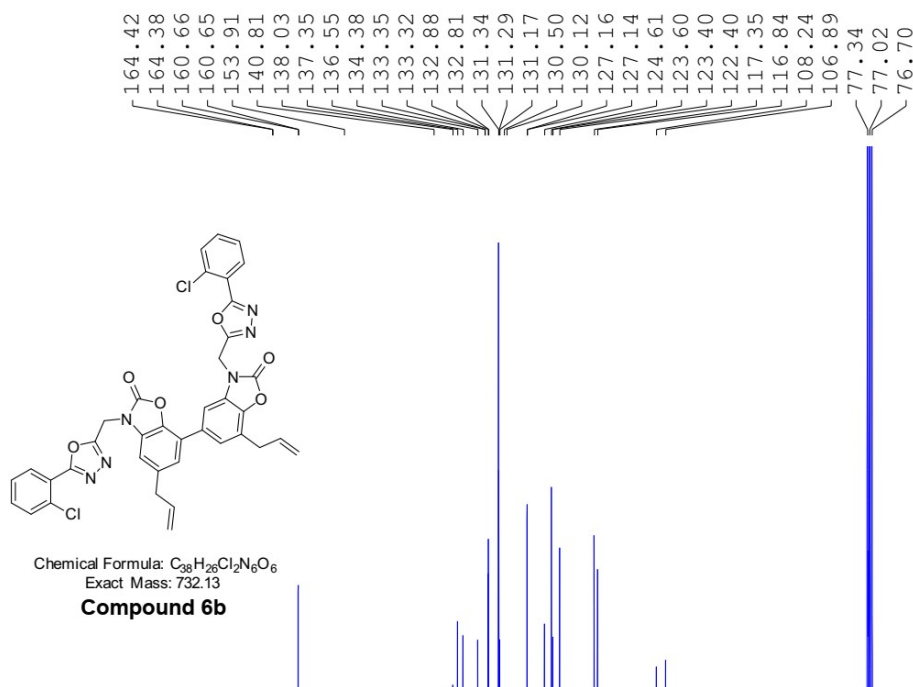

**Figure S6.**  $^{13}C$  NMR spectrum of **6b**

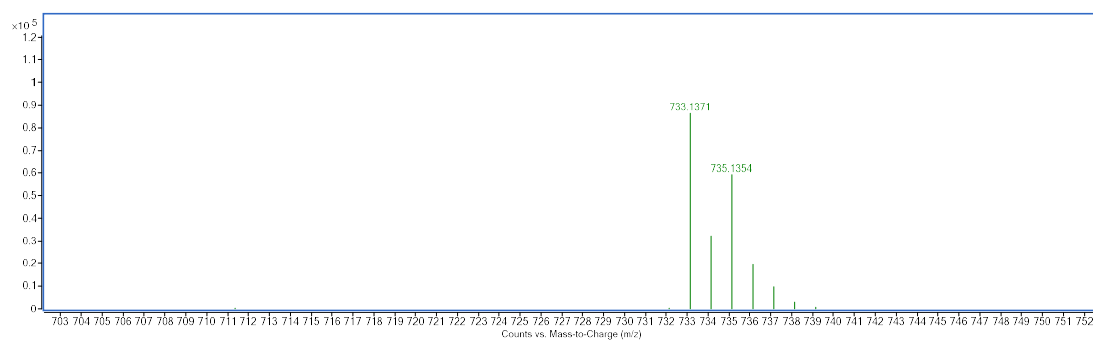

**Figure S7.** HRMS spectrum of **6c**

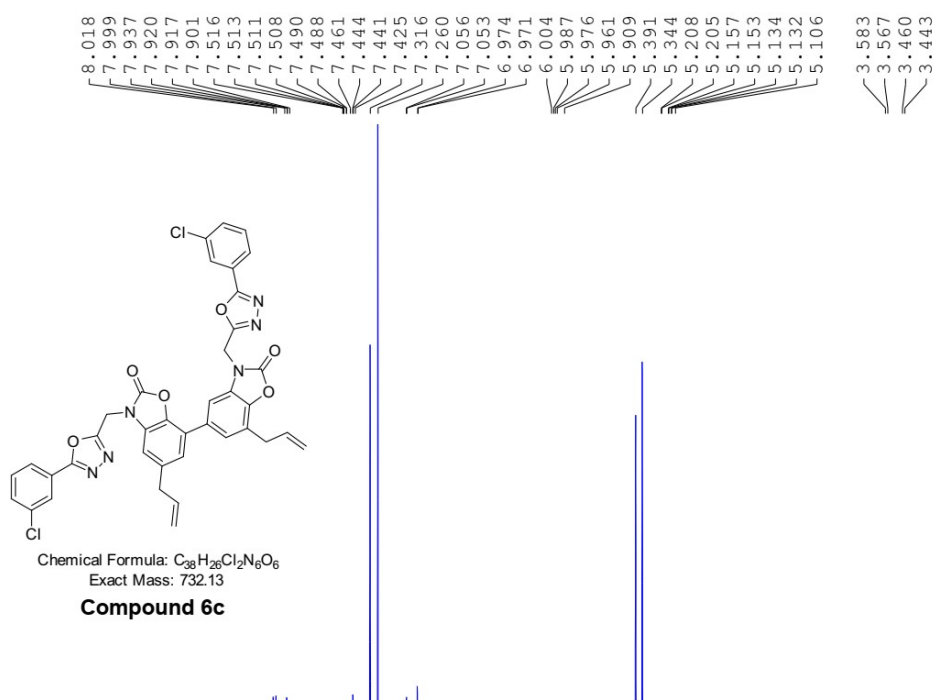

**Figure S8.** <sup>1</sup>H NMR spectrum of **6c**

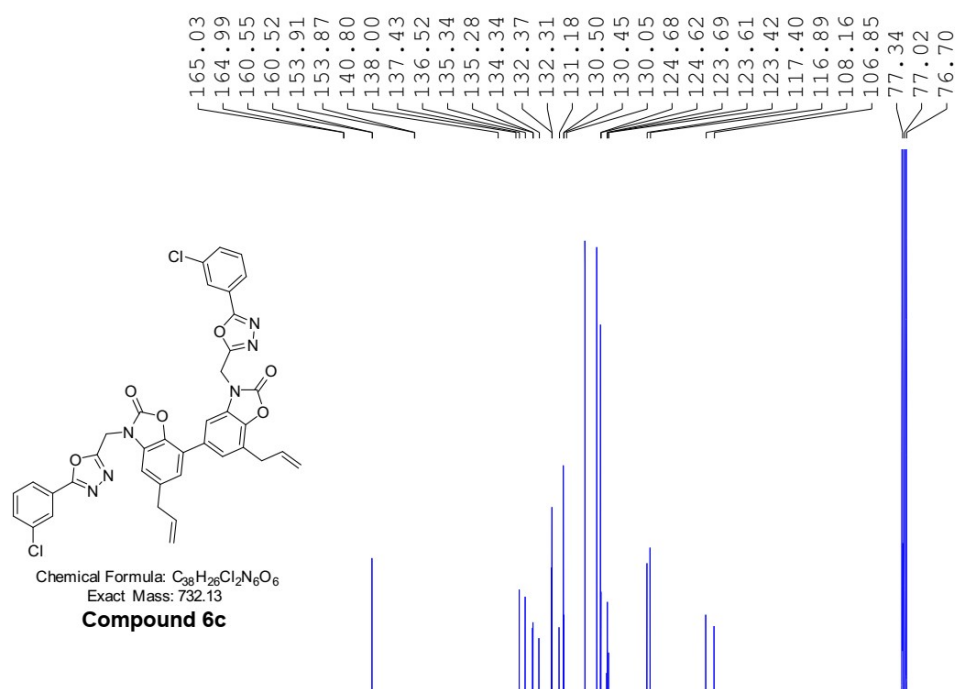

**Figure S9.**  $^{13}C$  NMR spectrum of **6c**

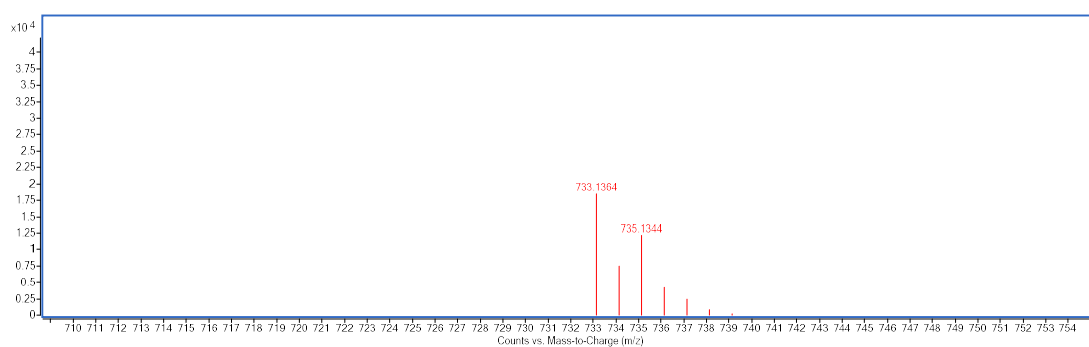

**Figure S10.** HRMS spectrum of **6d**

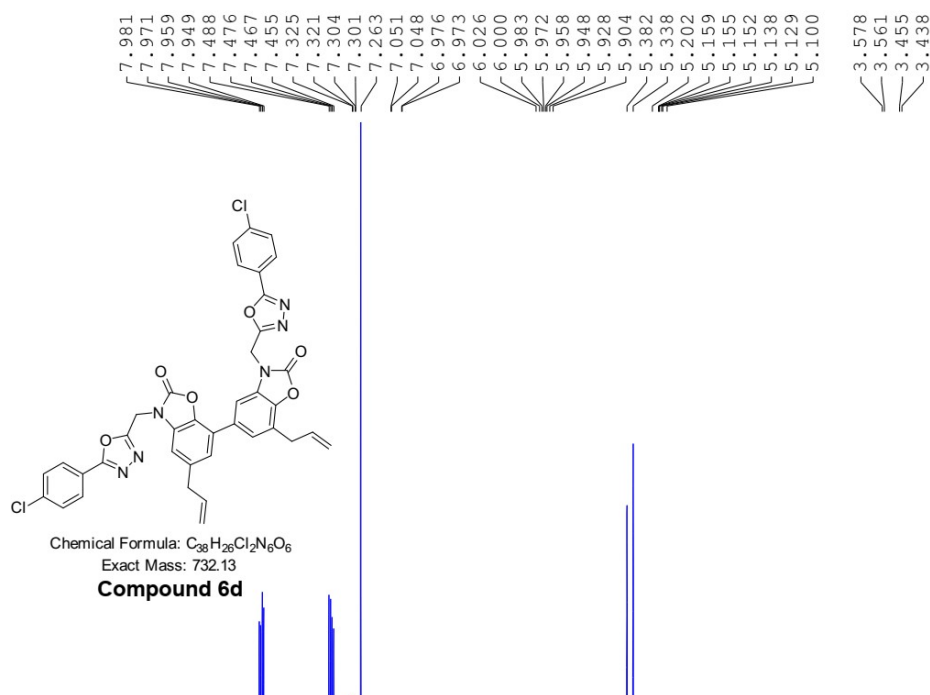

**Figure S11.**  $^1H$  NMR spectrum of **6d**

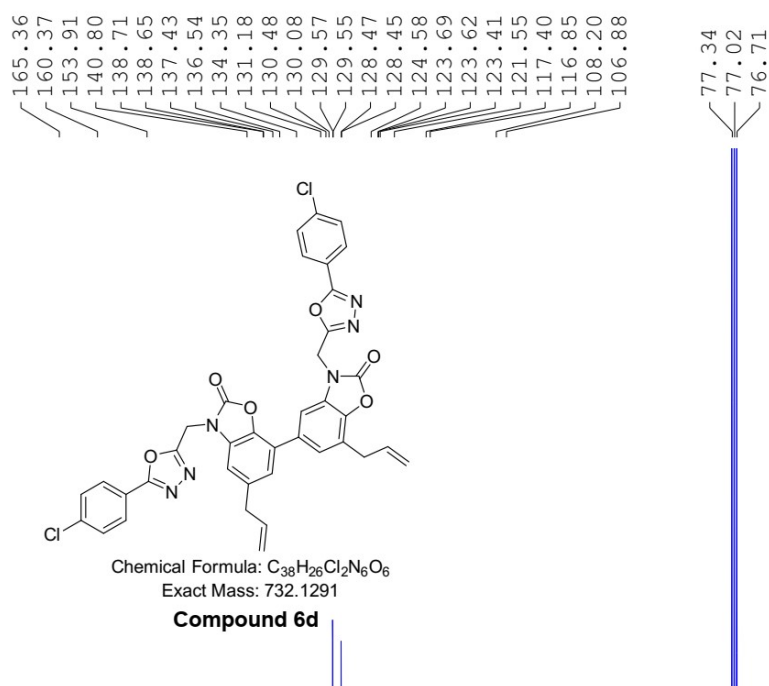

**Figure S12.**  $^{13}C$  NMR spectrum of **6d**

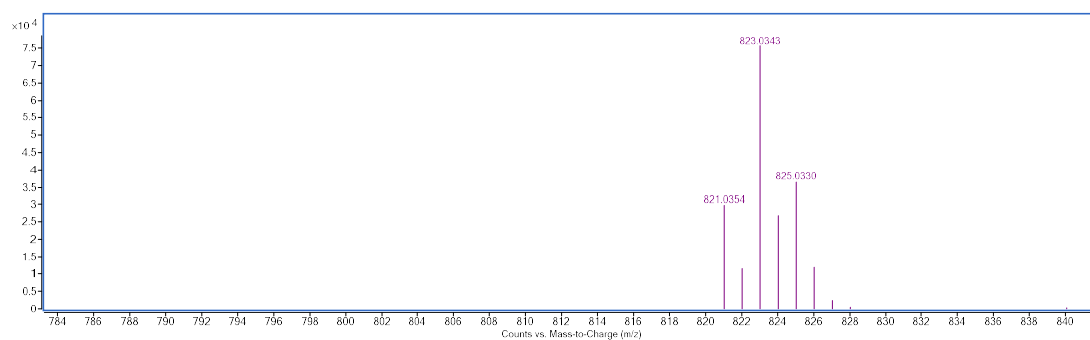

**Figure S13.** HRMS spectrum of **6e**

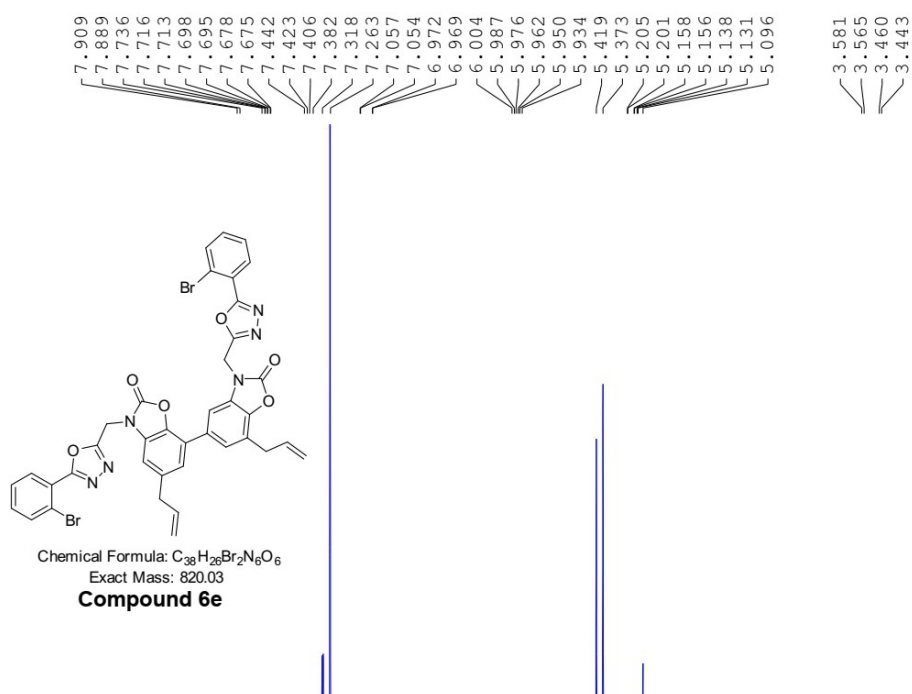

**Figure S14.** <sup>1</sup>H NMR spectrum of **6e**

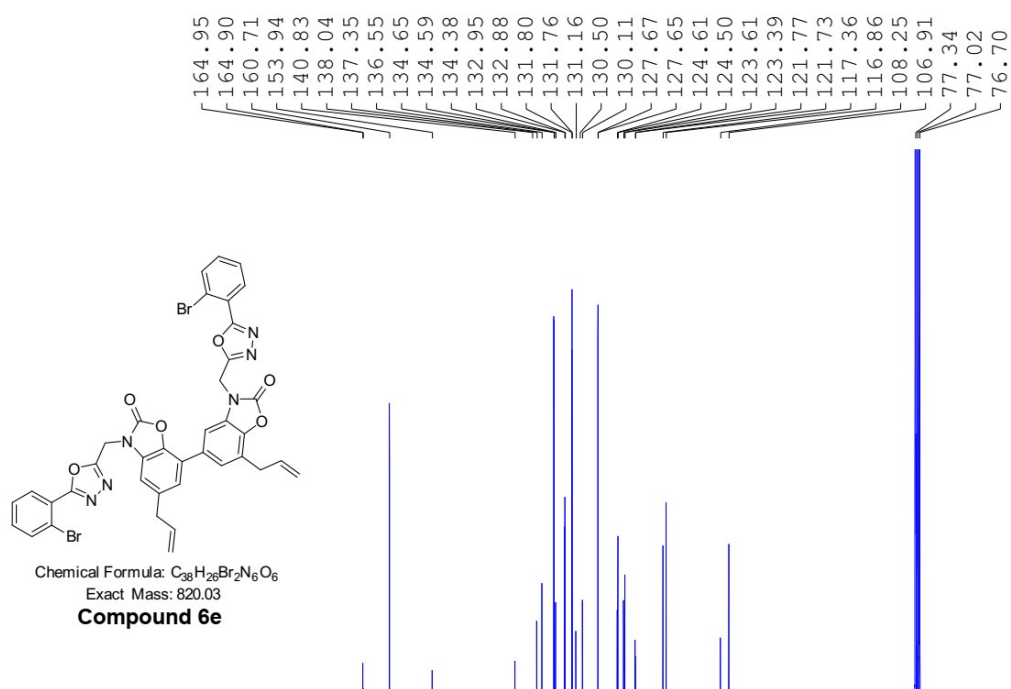

**Figure S15.**  $^{13}C$  NMR spectrum of **6e**

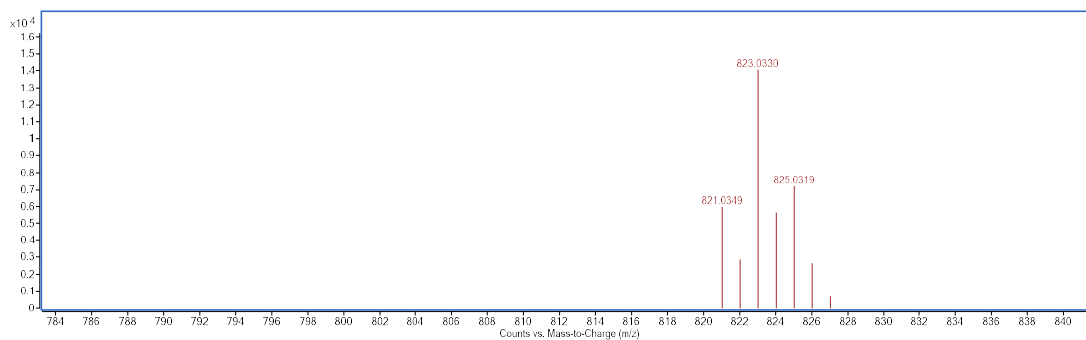

**Figure S16.** HRMS spectrum of **6f**

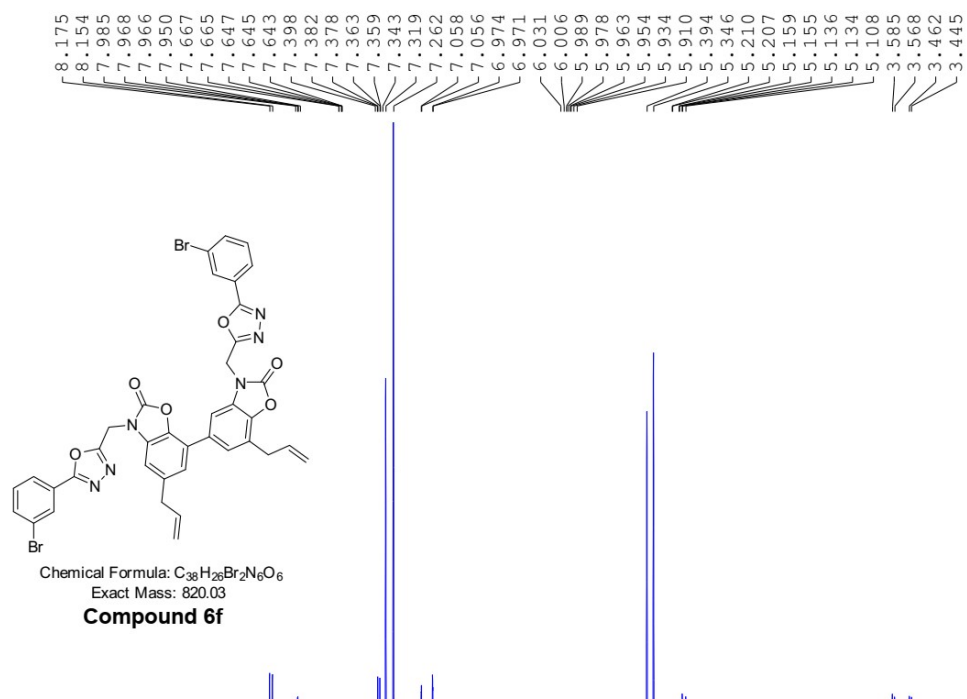

**Figure S17.**  $^1H$  NMR spectrum of **6f**

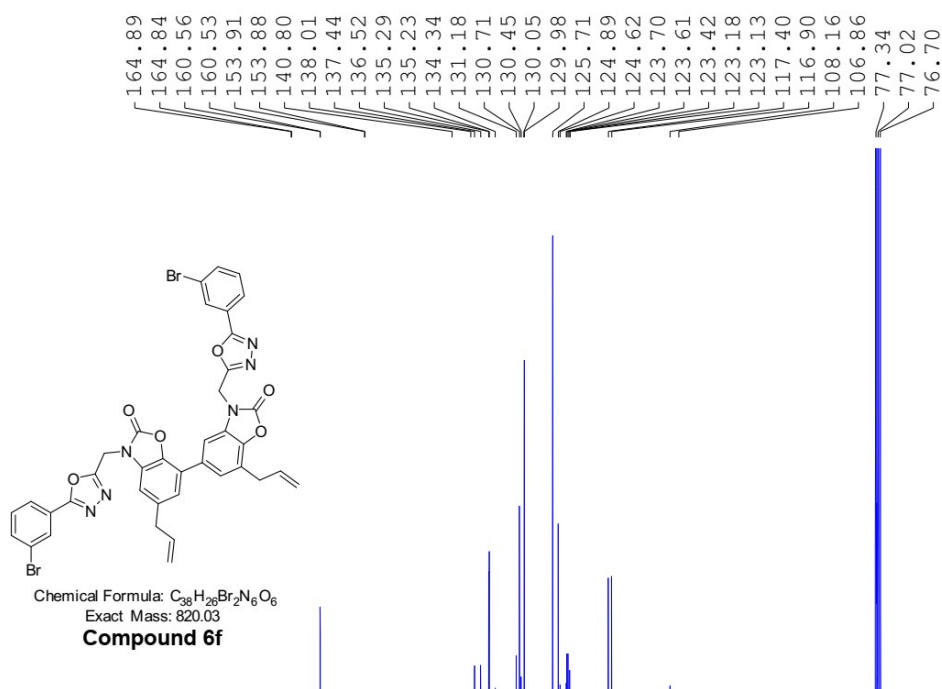

**Figure S18.**  $^{13}C$  NMR spectrum of **6f**

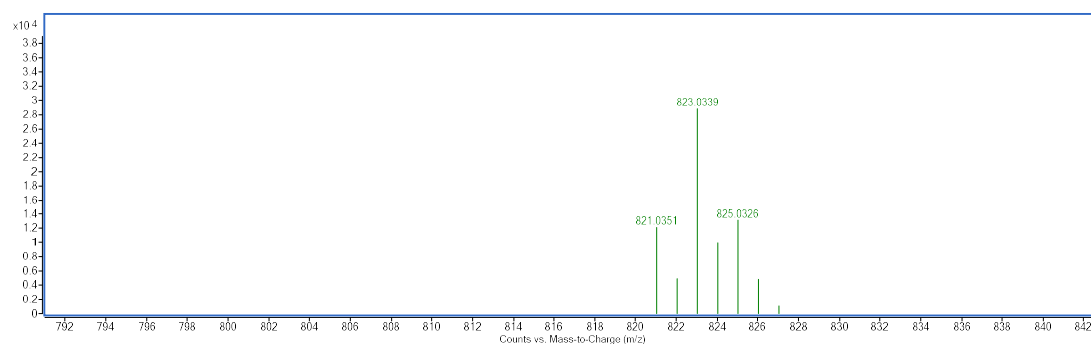

Figure S19. HRMS spectrum of **6g**

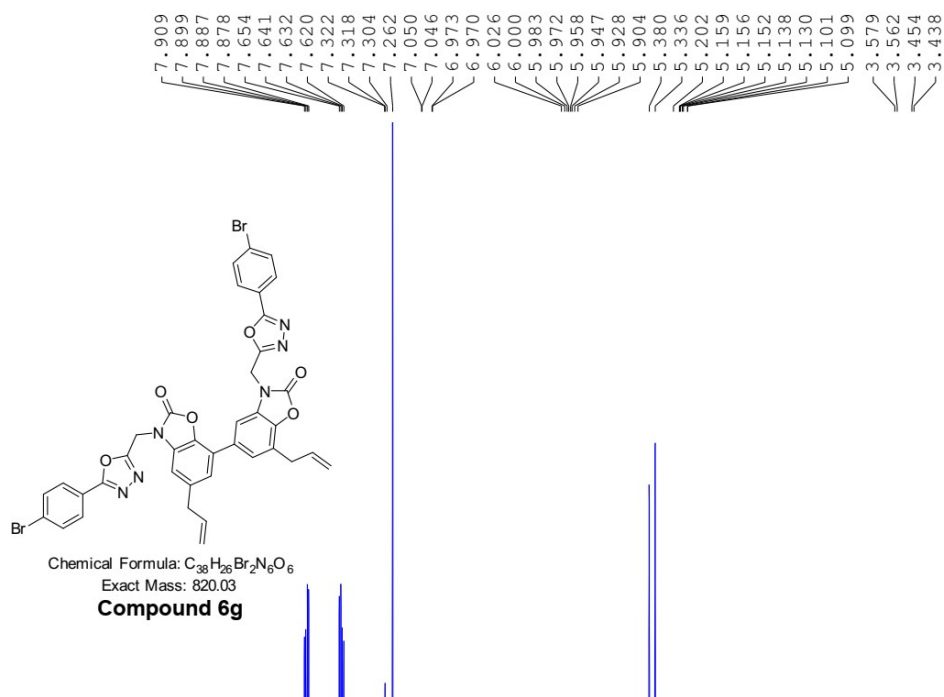

Figure S20. <sup>1</sup>H NMR spectrum of **6g**

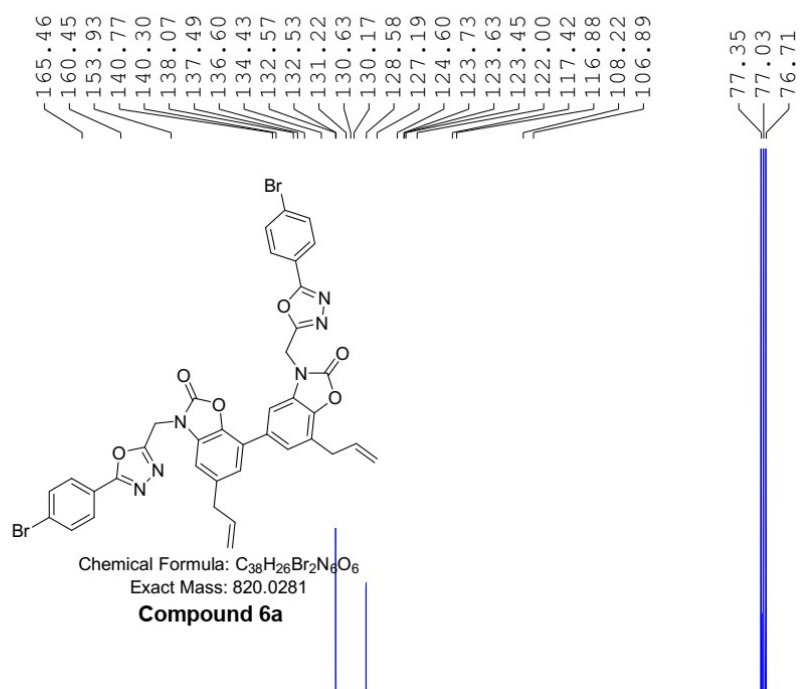

**Figure S21.** <sup>13</sup>C NMR spectrum of **6g**

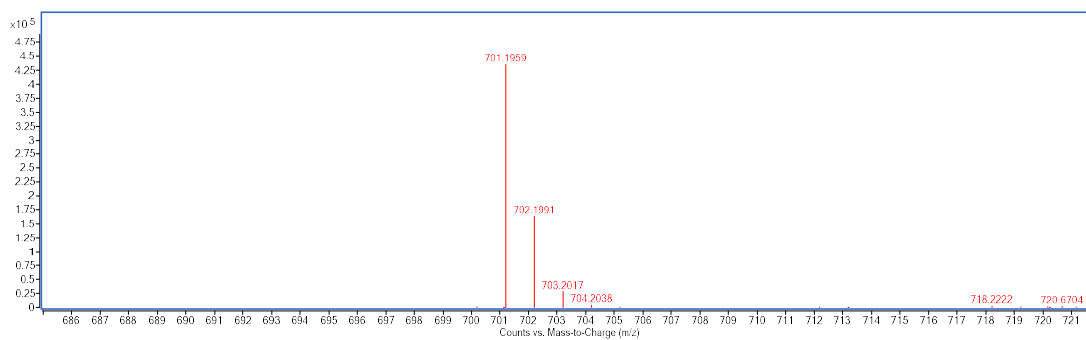

**Figure S22.** HRMS spectrum of **6h**

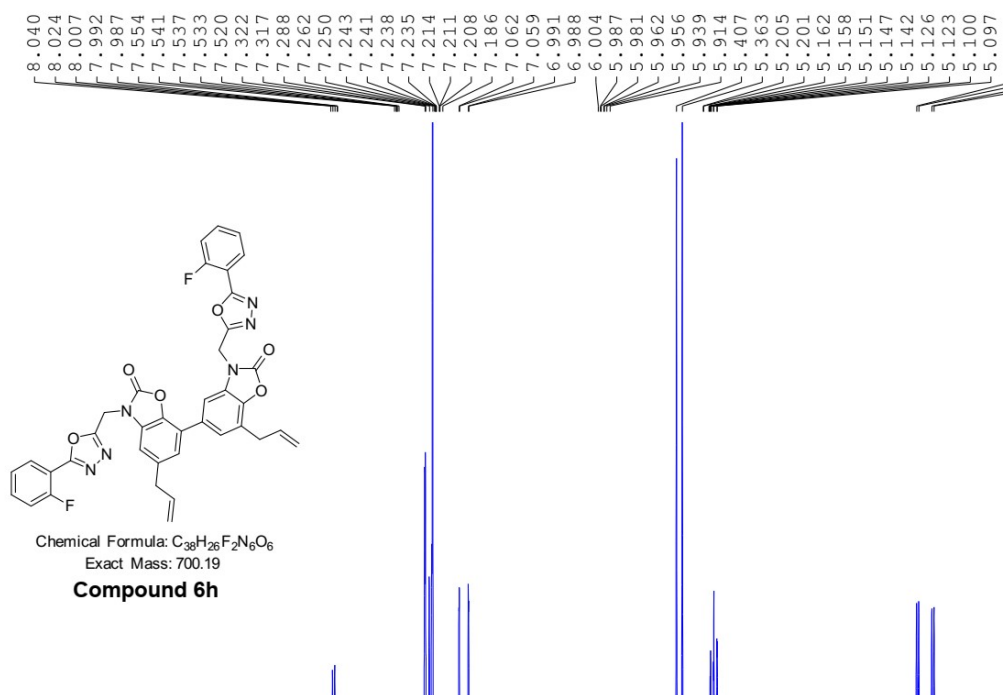

**Figure S23.**  $^1H$  NMR spectrum of **6h**

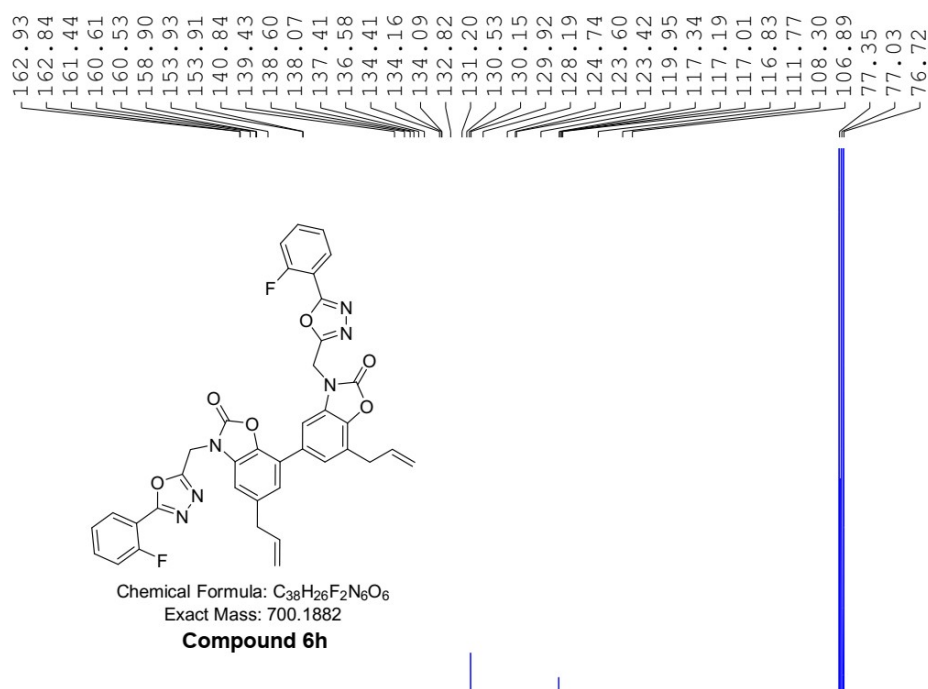

**Figure S24.**  $^{13}C$  NMR spectrum of **6h**

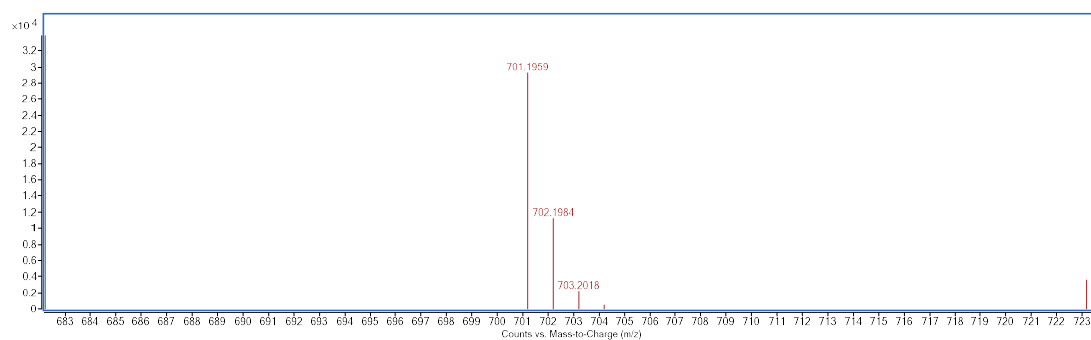

**Figure S25.** HRMS spectrum of **6i**

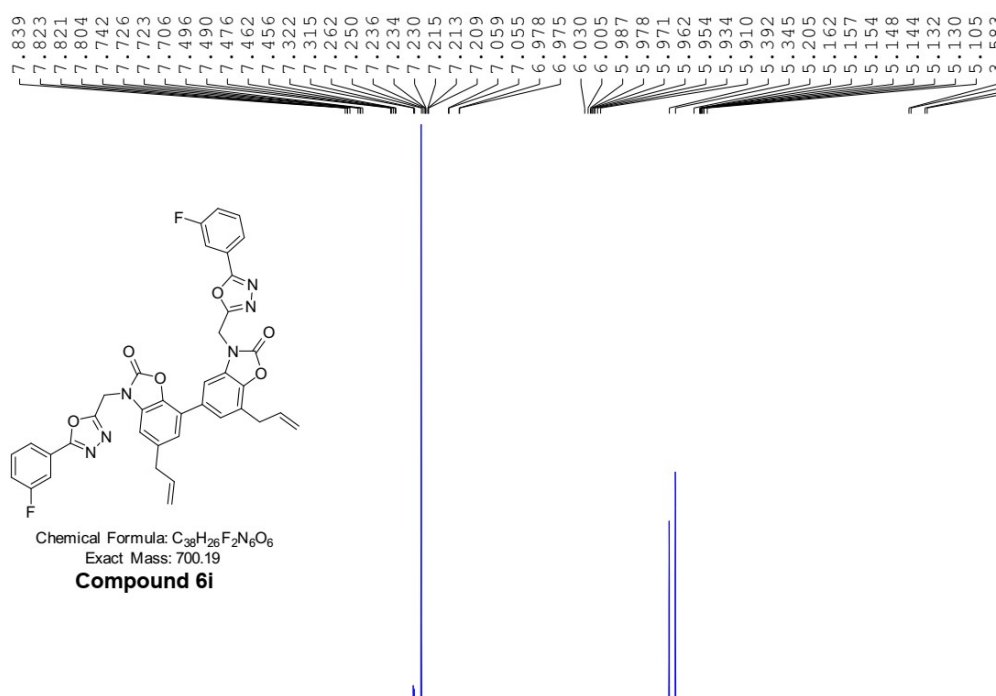

**Figure S26.** <sup>1</sup>H NMR spectrum of **6i**

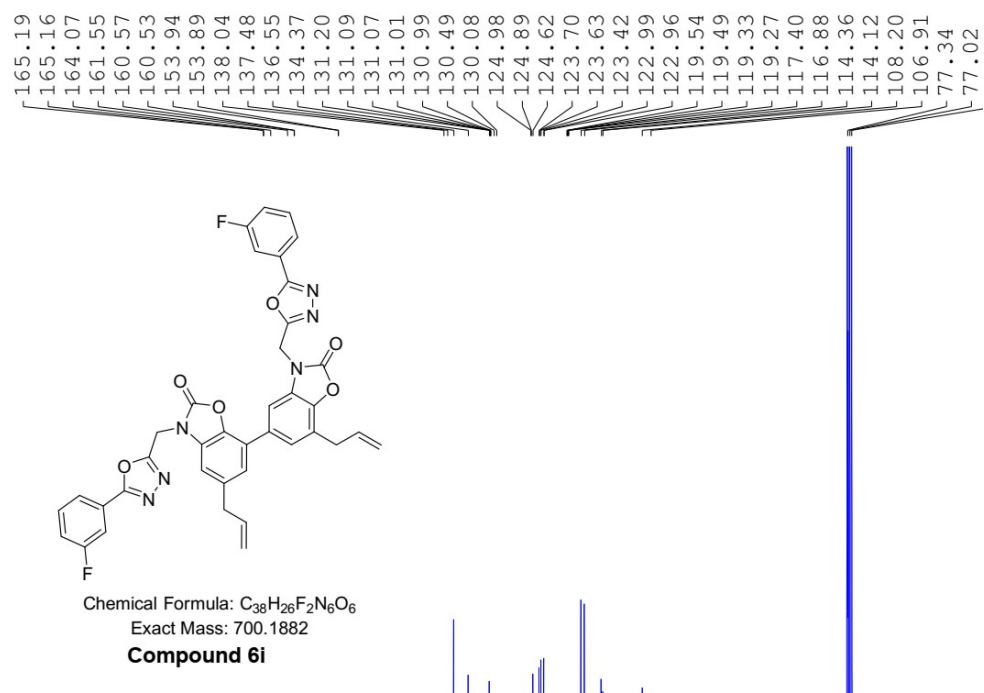

**Figure S27.**  $^{13}C$  NMR spectrum of **6i**

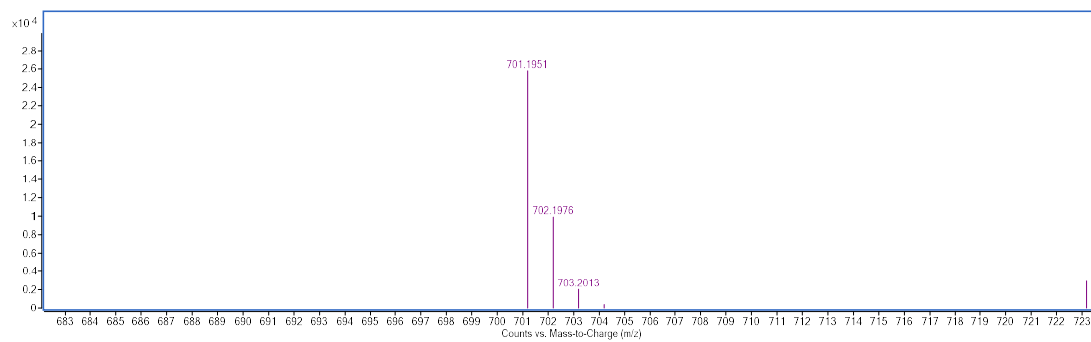

**Figure S28.** HRMS spectrum of **6j**

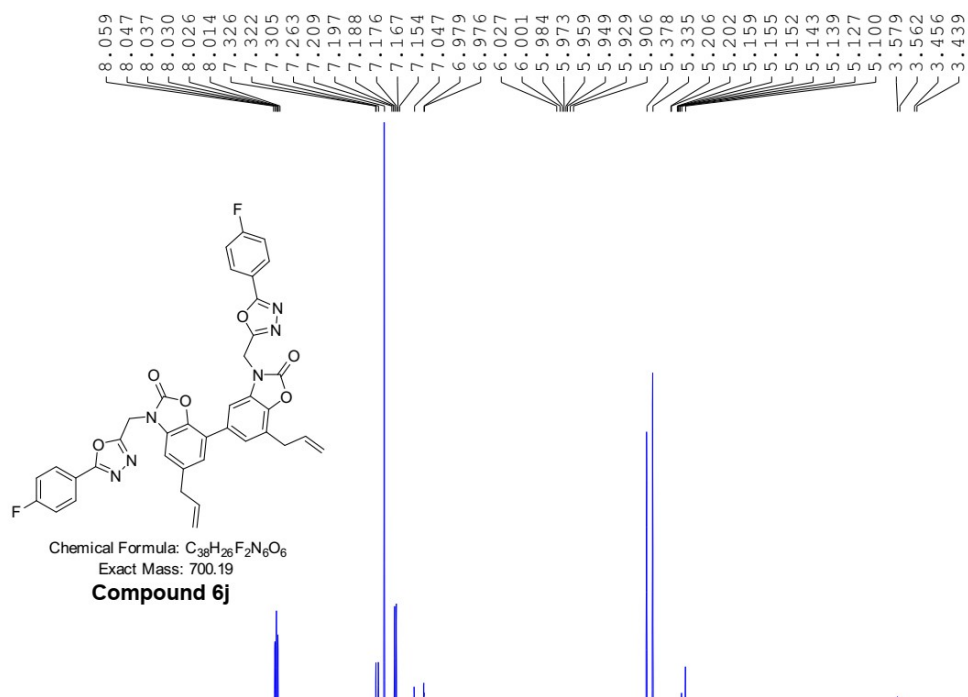

**Figure S29.** <sup>1</sup>H NMR spectrum of **6j**

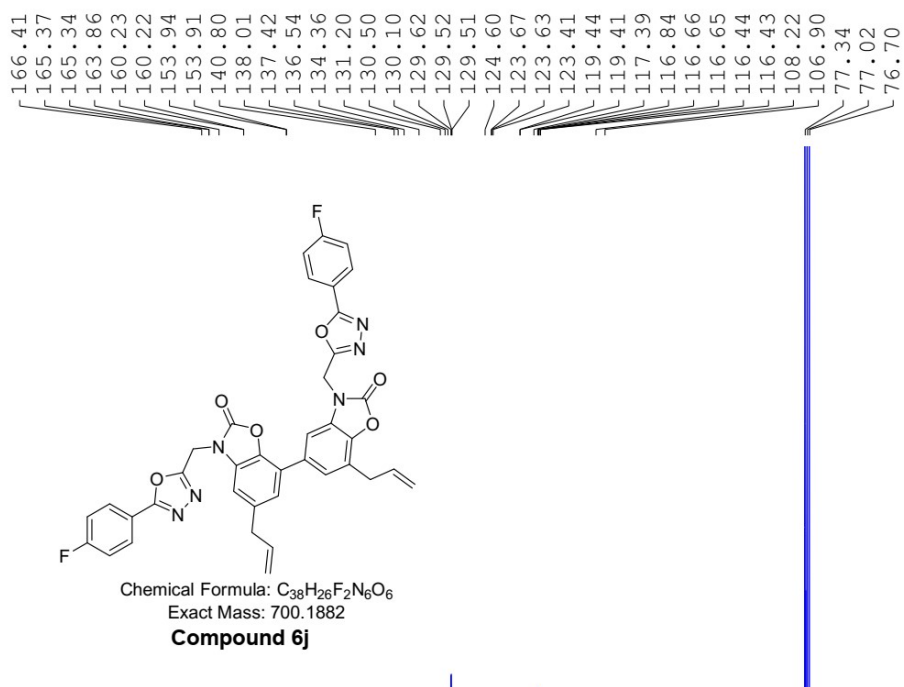

**Figure S30.** <sup>13</sup>C NMR spectrum of **6j**

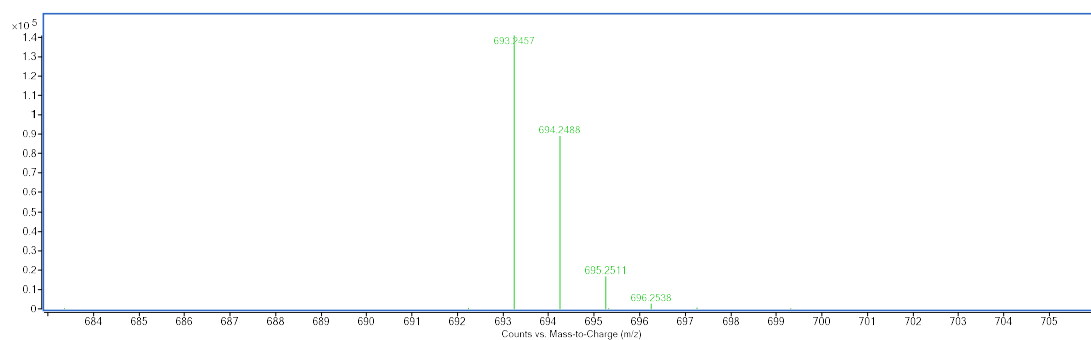

**Figure S31.** HRMS spectrum of **6k**

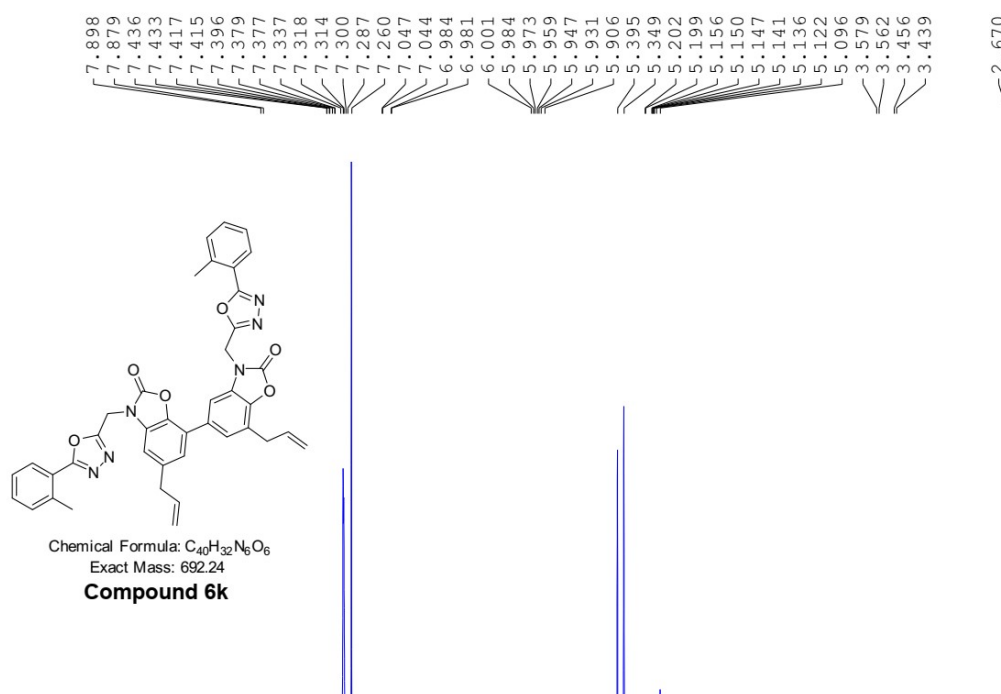

**Figure S32.** <sup>1</sup>H NMR spectrum of **6k**

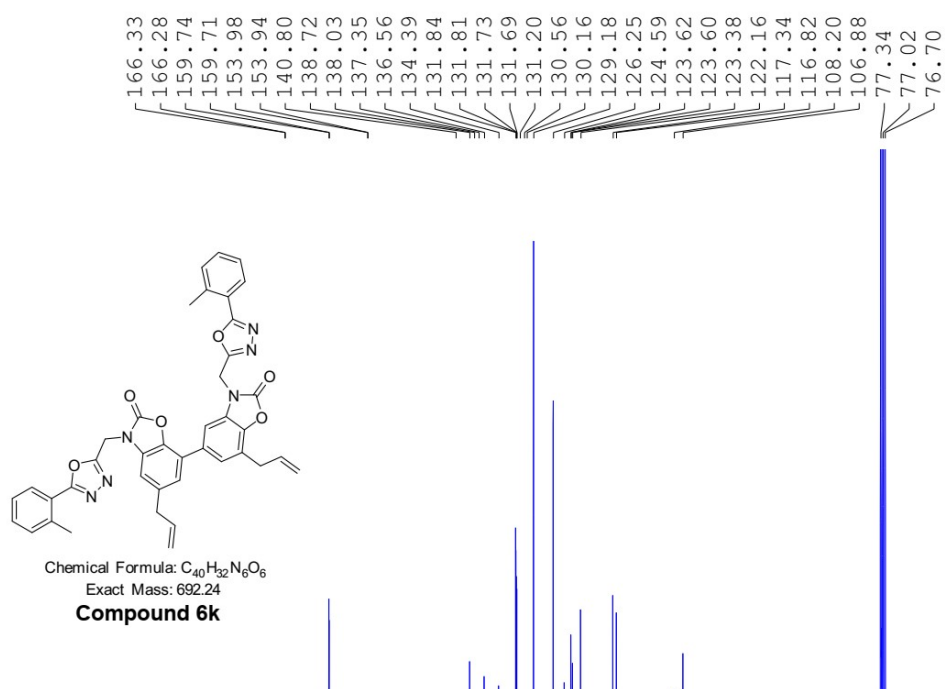

**Figure S33.**  $^{13}\text{C}$  NMR spectrum of **6k**

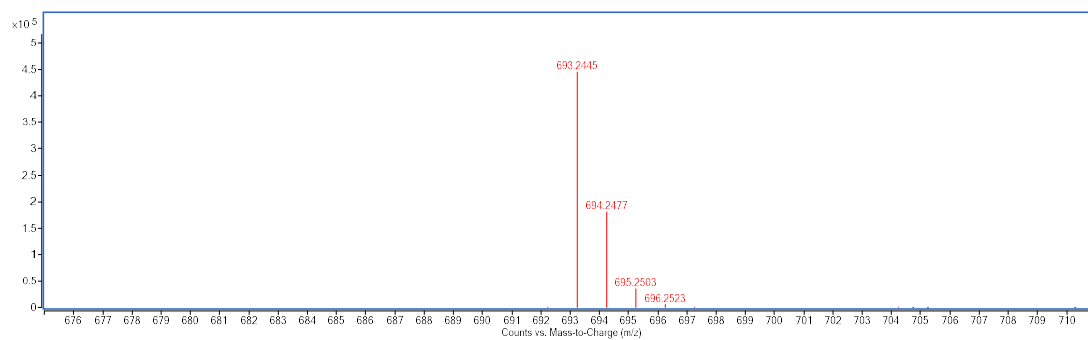

**Figure S34.** HRMS spectrum of **6l**

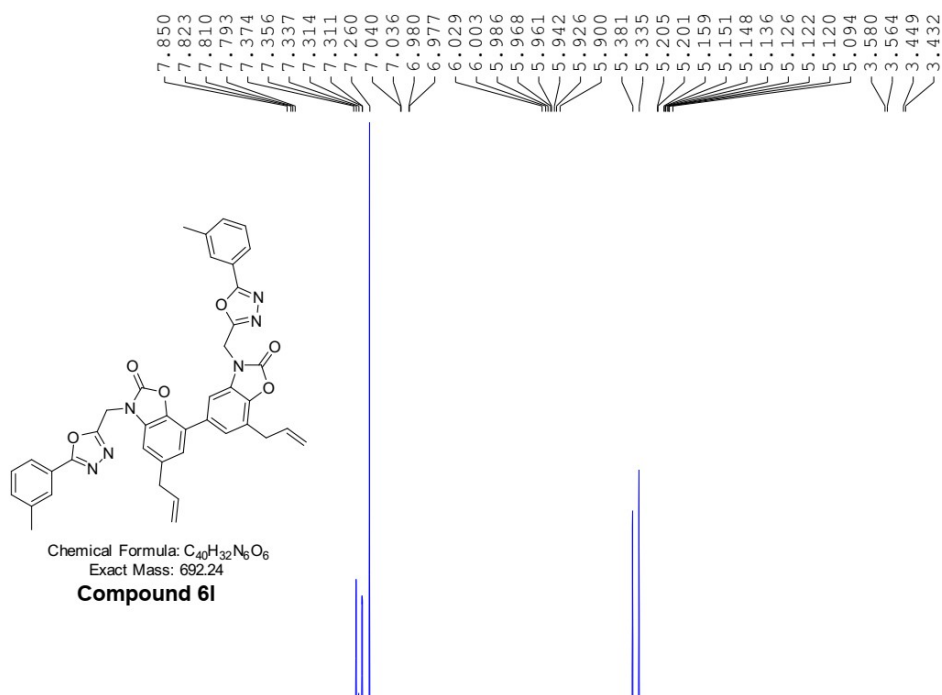

**Figure S35.**  $^1H$  NMR spectrum of **6l**

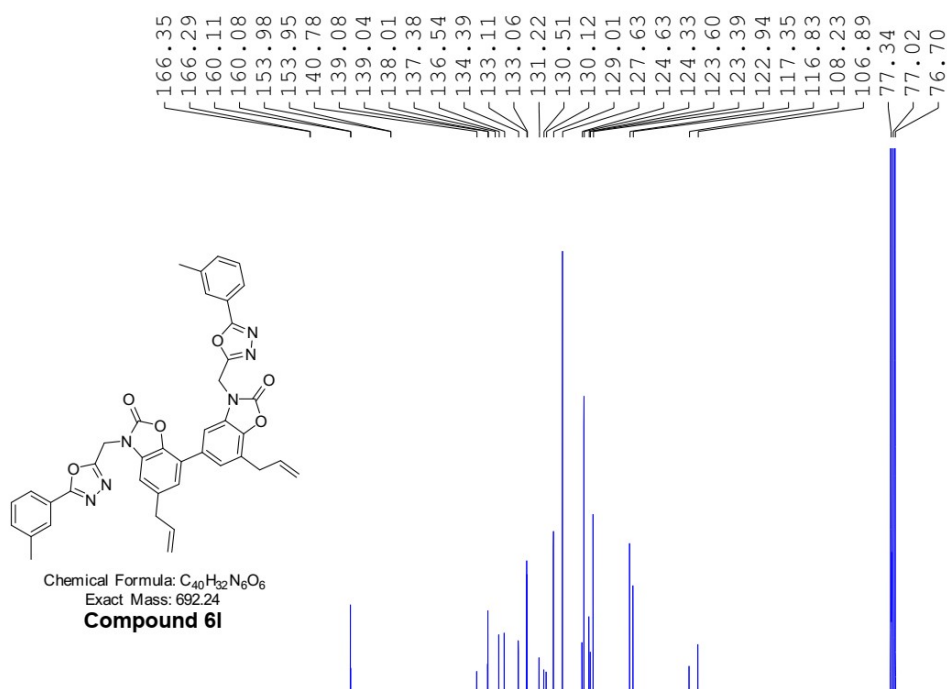

**Figure S36.**  $^{13}C$  NMR spectrum of **6l**

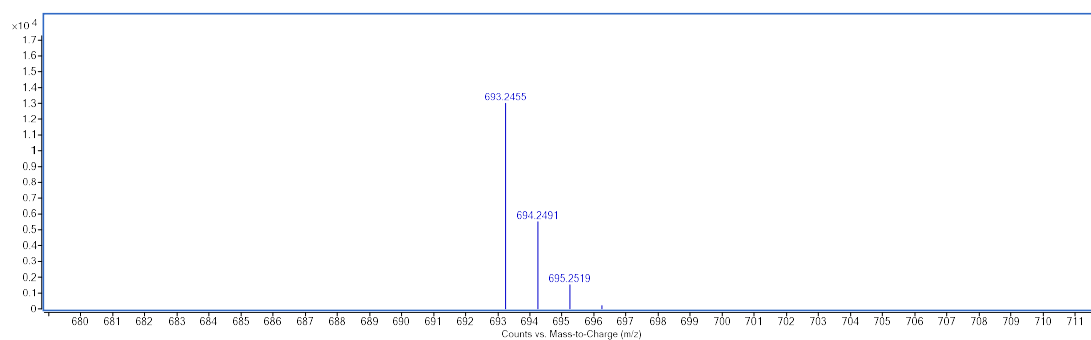

**Figure S37.** HRMS spectrum of **6m**

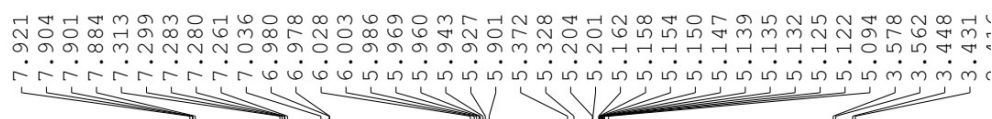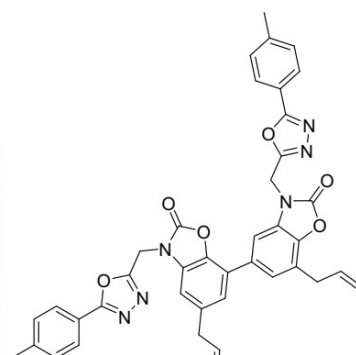

Chemical Formula: C<sub>40</sub>H<sub>32</sub>N<sub>6</sub>O<sub>6</sub>  
Exact Mass: 692.2383  
**Compound 6m**

**Figure S38.** <sup>1</sup>H NMR spectrum of **6m**

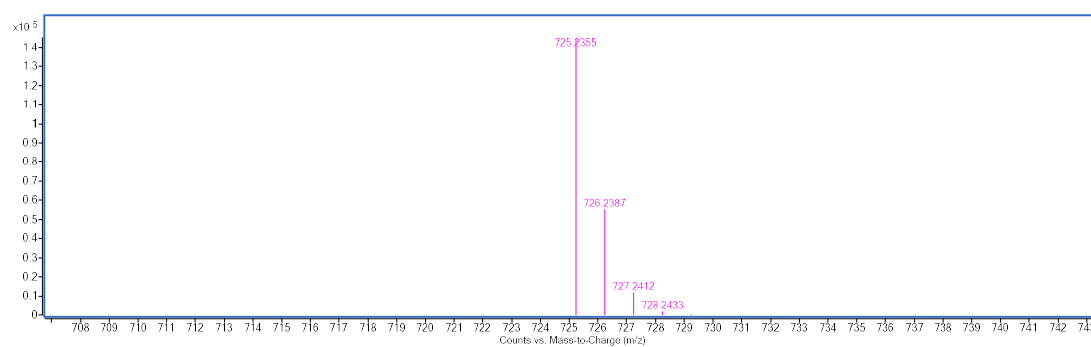

**Figure S39.** HRMS spectrum of **6n**

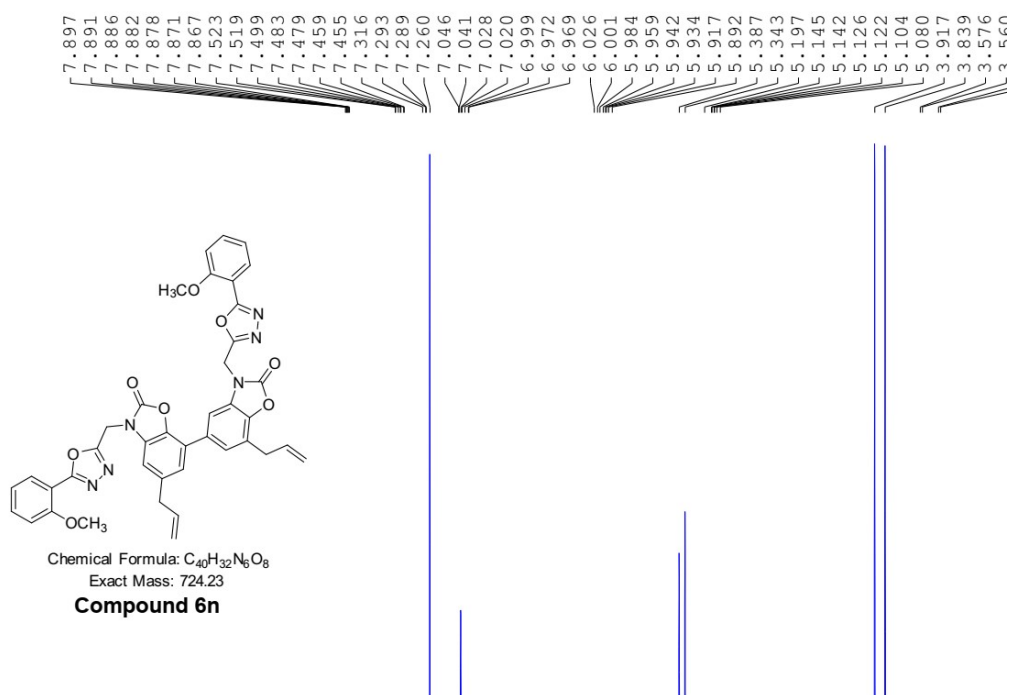

**Figure S40.**  $^1H$  NMR spectrum of **6n**

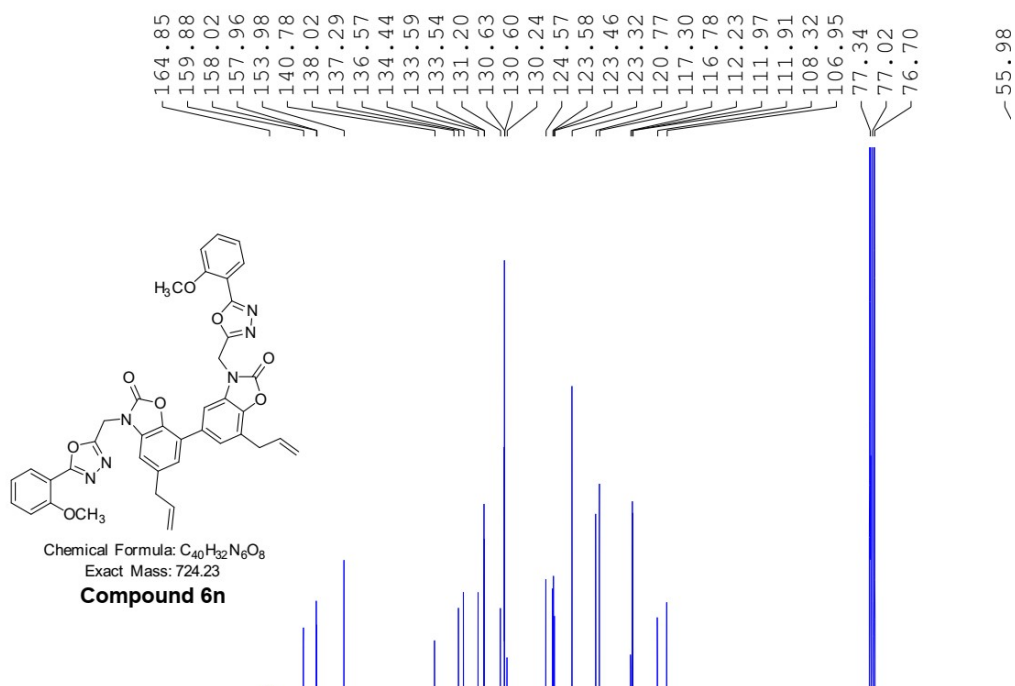

**Figure S41.**  $^{13}C$  NMR spectrum of **6n**

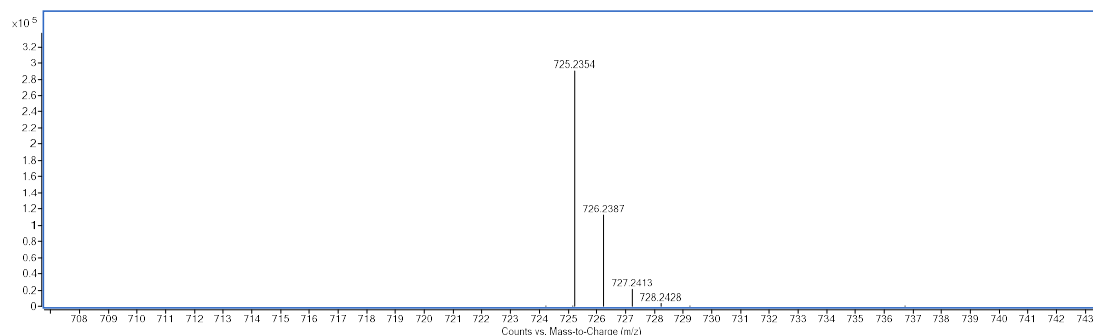

**Figure S42.** HRMS spectrum of **60**

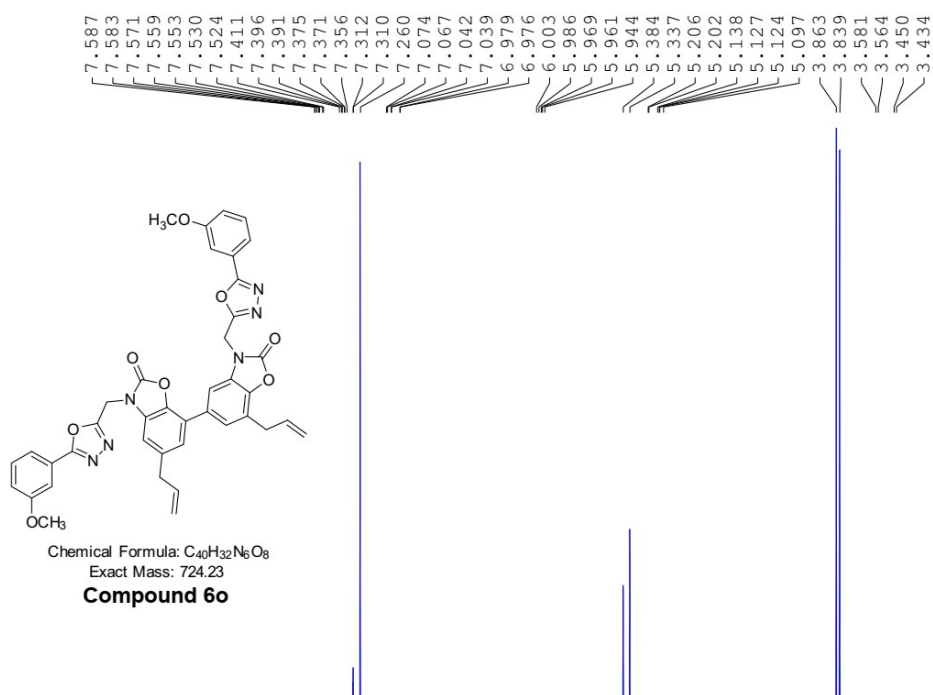

**Figure S43.** <sup>1</sup>H NMR spectrum of **60**

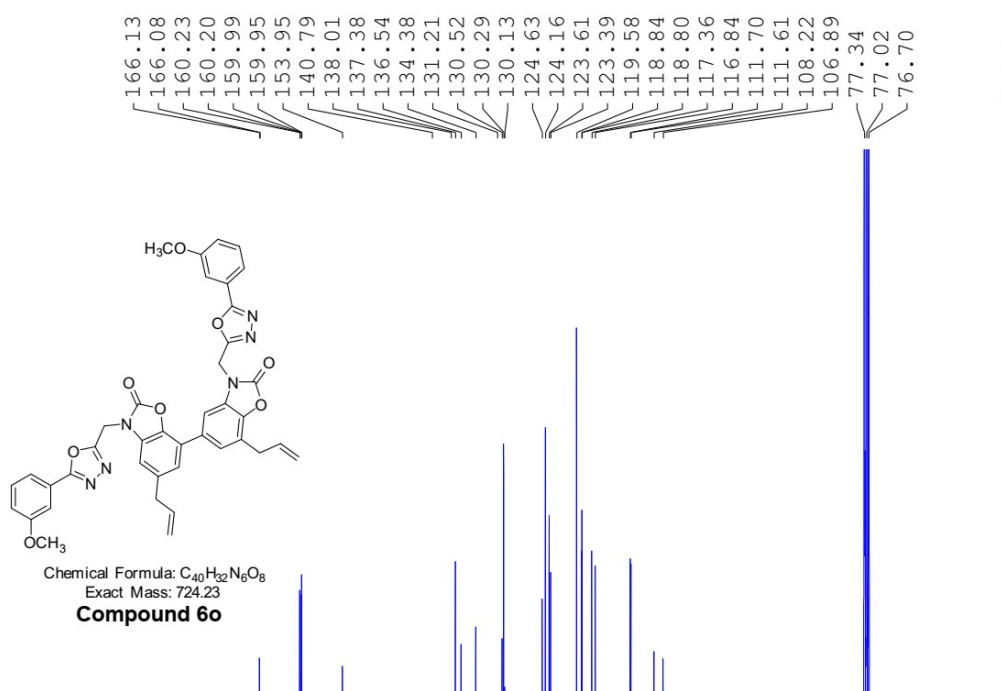

**Figure S44.**  $^{13}C$  NMR spectrum of **6o**

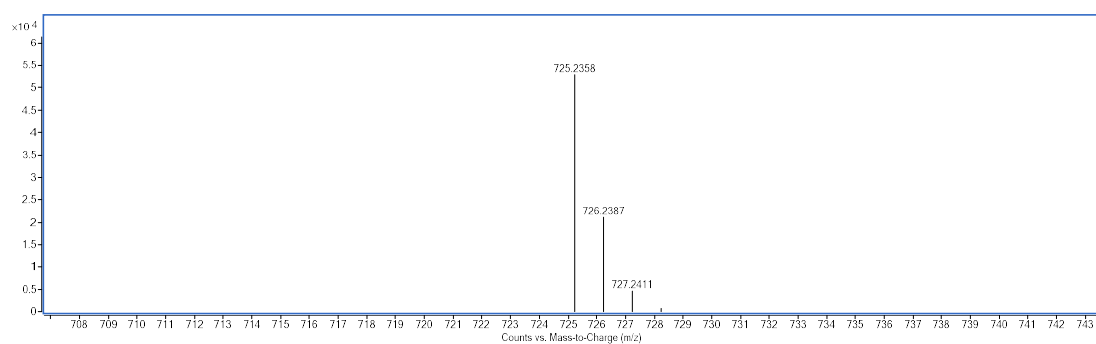

**Figure S45.** HRMS spectrum of **6p**

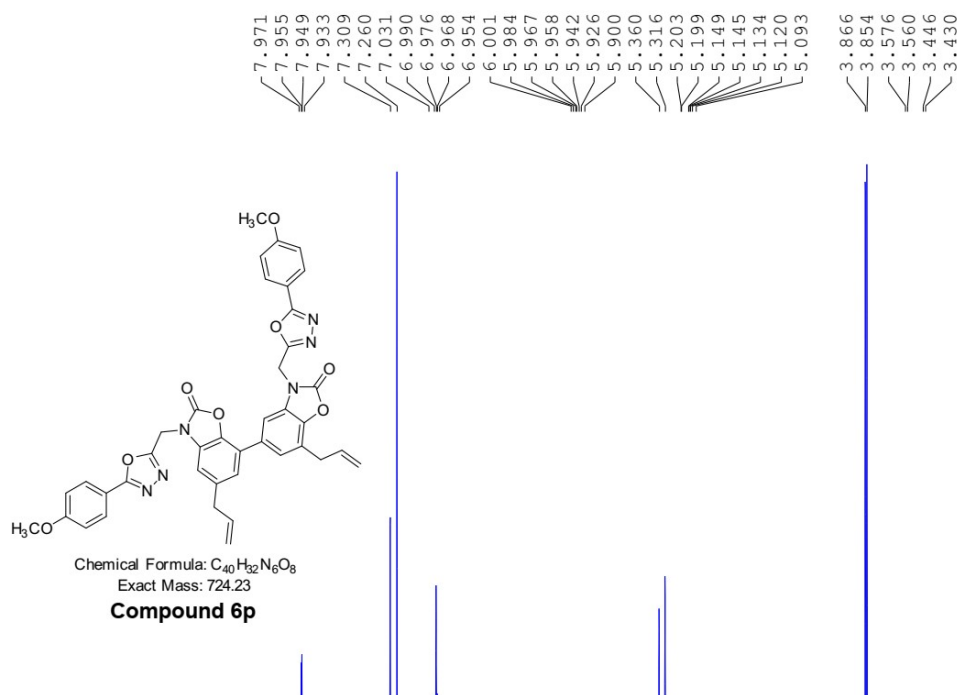

**Figure S46.**  $^1H$  NMR spectrum of **6p**

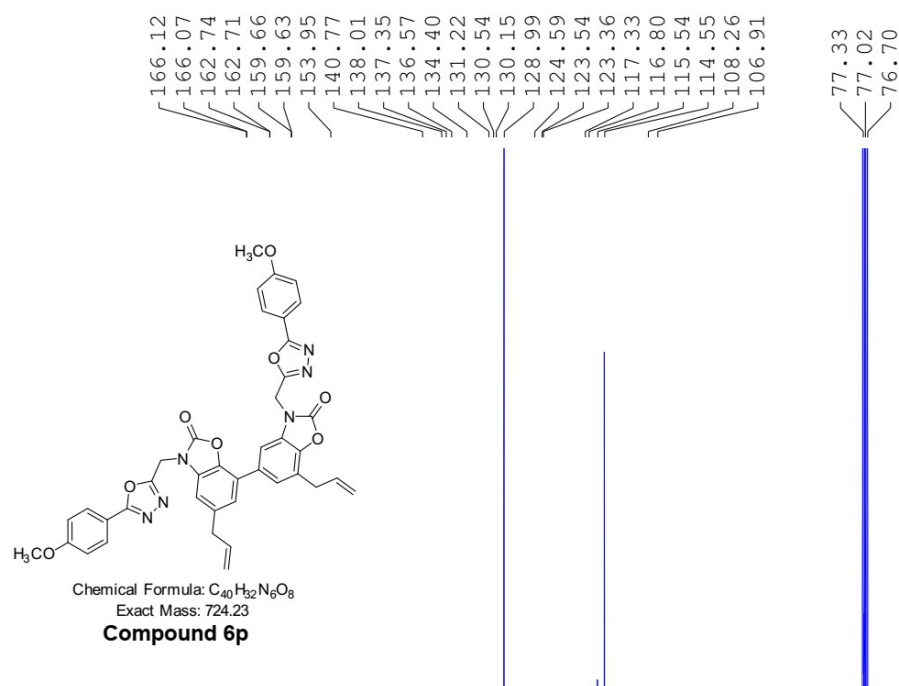

**Figure S47.**  $^{13}C$  NMR spectrum of **6p**
